# Supplementary material
Source: Springer Nature journal article supplement (https://www.springermedizin.de/resource/supplementary/13020_2006_3_MOESM4_ESM.pdf/9640790)

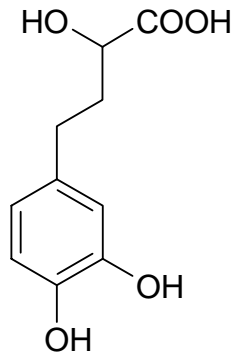

Danshensu

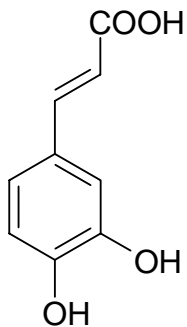

Caffeic acid

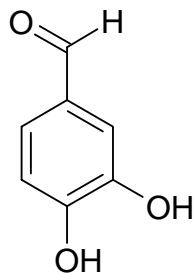

Protocatechualdehyde

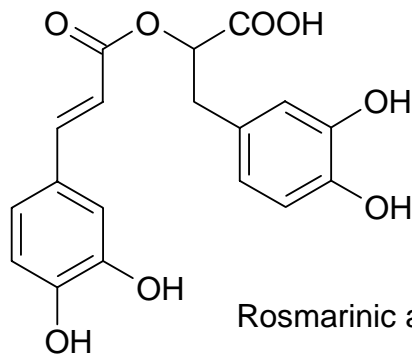

Rosmarinic acid

Supplement: MOESM4 [file 9640790]
